1 **The Time Required for Primary Care Consultations:**  
2 **Estimates of the Expected Duration of Initial Sick Child Visits in Low-**  
3 **and Middle-income Countries Using the Integrated Management of**  
4 **Childhood Illness (IMCI) Clinical Algorithm**

5 **Anthony Carter**

6 Professor Emeritus of Anthropology, University of Rochester

7 Correspondence: [anthony.carter@rochester.edu](mailto:anthony.carter@rochester.edu)

8

9 **Abstract**

10 **Background:** Little is known about the time required for primary care consultations, particularly  
11 those involving sick children in low- and middle-income countries (LMICs). This paper begins to  
12 fill that gap by providing evidence-based estimates of the time needed for initial visits with  
13 under-five infants and children at public or not-for-profit facilities in LMICs that use the  
14 Integrated Management of Childhood Illness (IMCI) clinical algorithm. The estimates are  
15 evidence-based and case-mix adjusted.

16 **Methods:** The expected duration of IMCI consultations in any given setting is a function of the  
17 health issues presented by patients less than 5 years old, the kind and number of tasks health  
18 workers must perform to care for such patients, and the time required to complete those tasks.  
19 Determining the time needed to complete tasks with no minimum duration requires, in addition  
20 to tabulations of health issues and lists of tasks to be performed, information on rates of task

1 performance and the mean observed duration of consultations. All this information was  
2 located, first, by searching MEDLINE, the database of the International Network for Rational Use  
3 of Medicines, the websites of the WHO and its regional offices, GOOGLE, and GOOGLE SCHOLAR  
4 using search terms such as 'Integrated Management of Childhood Illness', 'observational',  
5 'prospective', 'classification', 'clinical signs', 'health facility survey', 'validity', 'algorithm', and  
6 'chart booklet'. Additional information was found by reviewing work that cited a qualified study  
7 and, conversely, material included in the bibliographies of qualified studies.

8 **Results:** Estimates of the expected mean duration of initial consultations were constructed for  
9 39 patient populations in 22 countries. The mean ranges from 17.1 to 20.5 minutes in the infant  
10 populations and from 15.5 to 26.4 minutes in the child populations. The shortest consultations  
11 range from 16.1 to 16.7 minutes in the infant populations and from 11.0 to 17.4 minutes in the  
12 child populations. The 98<sup>th</sup> percentile of expected durations ranges from 21.5 to 25.7 minutes in  
13 the infant populations and from 22.5 to 35.2 minutes in the child populations.

14 **Conclusions:** IMCI consultations with infants and children presenting for the first time with a  
15 new concern require considerably more time than previously recognized. This suggests that the  
16 personnel costs of providing appropriate IMCI services may be substantial. It also confirms that  
17 the quality of most IMCI consultations is low.

18

19 **Keywords:** Integrated Management of Childhood Illness; Primary care; Sick-child visits;  
20 Consultation; Expected Duration; Tasks; Observational Study; Low- and Middle-Income  
21 Countries

## 1 **Introduction**

2 Little is known about the time required for primary care consultations, particularly those  
3 involving sick children in low- and middle-income countries (LMICs). This paper begins to fill that  
4 gap by providing estimates of the time needed for initial visits with under-five infants and  
5 children at public and not-for-profit facilities in LMICs that use the Integrated Management of  
6 Childhood Illness (IMCI) clinical algorithm. The estimates are evidence-based and case-mix  
7 adjusted.

8 Health care providers have a great deal to do during primary care visits. They must begin  
9 the consultation, establish rapport, elicit the patient's concerns, gather information about  
10 presenting illnesses, perform a physical exam, discuss diagnosis and treatment, summarize, and  
11 bring the consultation to a close [1, 2{Byrne, P, 1976}]. The time required to accomplish all this  
12 remains something of a mystery. In general, it is thought that consultations rarely should be  
13 shorter than ten minutes [3, 4]. It also is thought that longer consultations generally are  
14 superior to shorter ones. Longer visits do not guaranteed appropriate care [4], but in Europe  
15 and North America physicians in longer consultations recognize more issues, explore more  
16 psychosocial concerns, give fewer prescriptions, and/or provide more preventive measures [5-  
17 12]. Similarly, during longer consultations in Tanzania, clinical officers and assistant medical  
18 officers ask more questions and perform more examinations [13]. Longer consultations often  
19 are essential for those with multiple morbidities [3]. Finally, several experienced physicians in  
20 the United States and Argentina regard 15 to 20 minutes as the optimal duration of primary  
21 care visits [14, 15].

1           It has been suggested that the time required for IMCI consultations falls in the lower half  
2 of this range. A leading member of the team that designed the IMCI algorithm suggests that  
3 IMCI consultations “can be completed in 10-15 min although some cases take longer” [16].  
4 According to the World Health Organization (WHO), the mean duration of sick-child  
5 consultations in primary care facilities where the IMCI algorithm is used is 15 minutes [17].

6           The problem with all of this is that it rests on little or no evidence. None of it takes  
7 account of the mix of problems with which patients present [12, 18], the tasks involved in  
8 patient care, or the time required to perform such tasks.

9           The IMCI clinical algorithm and the research surrounding it provide unusually rich  
10 resources with which to address these issues. A comprehensive program to reduce  
11 “unacceptably high” infant and child mortality in LMICs, IMCI was developed in the mid 1990s  
12 by the WHO and the United Nations Children’s Fund and has been widely adopted [19, 20]. IMCI  
13 seeks to encourage proper health practices in families and communities, to strengthen health  
14 care systems, and to improve the technical quality of primary care services. The IMCI clinical  
15 algorithm is the key means used to achieve the last of these aims. Concerned with health issues  
16 frequently found in resource-poor settings [16, 21, 22], the algorithm integrates a variety of  
17 interventions shown to be cost-effective in previous vertical programs [23]. For infants less than  
18 2 months old, it focuses on bacterial infections, feeding problems, low weight, and, in some  
19 versions, jaundice. For children 2-59 months old, the foci include acute respiratory infections,  
20 especially pneumonia; diarrhea; fevers, especially malaria and measles; malnutrition, and  
21 anemia. Immunization status is a concern for both age groups. The algorithm provides a scheme  
22 to identify the health issues presented by under-5 patients, tasks to be used in the care of such

1 patients, and criteria by which tasks are elicited. Crucially, research on the design and use of the  
2 algorithm, its effects on provider performance, and related topics furnishes the information  
3 needed to estimate the expected duration of initial consultations with sick children and infants.

#### 4 **METHODS**

5 The expected duration of IMCI consultations in any given setting is a function of the health  
6 issues presented by patients less than 5 years old, the kind and number of tasks health workers  
7 must perform to care for such patients, the time required to complete those tasks, and, in a few  
8 instances, the organization of work within facilities. An estimate of the time needed to perform  
9 tasks that have no predetermined duration requires information on health issues presented,  
10 tasks to be performed, task-specific performance rates, and the mean observed duration of  
11 consultations.

#### 12 **Definitions**

13 Health Issues and Classifications. Health issues are conditions presented by patients that  
14 require providers to perform tasks.

15 IMCI classifications are categories used to organize signs and symptoms indicative of the  
16 character, occurrence, and severity of health issues that account for a substantial portion of  
17 child mortality in low- and middle-income countries. Classifications differ from “etiologically  
18 distinct diagnoses” in two ways [24]. Some combine distinct diseases into a single category. “For  
19 example, a child with the classification ‘very severe febrile disease’ could have meningitis (viral  
20 or bacterial), ... sepsis (from several possible pathogens), ... cerebral malaria,” pertussis, plague,  
21 or pneumonia. Conversely, a single disease may be assigned different IMCI classifications if it  
22 presents with different levels of severity. If pneumococcal pneumonia presents with cough and

1 fast breathing it is classified as ‘pneumonia’; however, if it presents with cough and stridor, it is  
2 classified as ‘severe pneumonia/very severe disease’. Similarly, in areas of high malaria risk,  
3 malaria presenting with fever alone is classified as ‘malaria’. When it presents with fever and a  
4 stiff neck or unconsciousness it is classified as ‘very severe febrile disease.’

5 Most classifications designate one or another of the health issues with which the IMCI  
6 algorithm is concerned. However, a subset of classifications indicates aspects of health issues  
7 rather than the issues themselves. Classifications for ‘persistent diarrhea’ and ‘dysentery’  
8 indicate aspects of diarrhea and are initially counted in classifications for ‘dehydration’.  
9 Classifications for ‘measles’ or ‘dengue’ indicate aspects of fever and are initially counted in  
10 classifications for that issue.

11 The labels for three health issues, ‘HIV status’, ‘other problems’ and ‘missing  
12 immunizations’, involve no classifications. One issue requiring preventive care has no label; it  
13 occurs when a child  $\geq 2$  months old but  $< 2$  years old has been given the classifications ‘not very  
14 low weight’ and ‘no anemia’.

15 Classification Profiles. Classification profiles are tabulations of the IMCI classifications,  
16 other health issues, and ancillary findings present in patient populations.

17 Tasks. A task is a piece of physical work IMCI-trained providers may have to perform  
18 during a consultation. The performance of a task requires providers to use their ears, eyes,  
19 hands, and/or voices in ways that consume time. The IMCI clinical algorithm is an arrangement  
20 of tasks.

21 Providers also are expected to make a variety of decisions, as in ‘Classify COUGH OR  
22 DIFFICULT BREATHING’, ‘Decide the Malaria Risk: high or low’ if a child has a fever, and

1 'IDENTIFY TREATMENT'. However, in this paper, these decisions do not count as tasks because  
2 they are cognitive rather than physical and are not inherently time-consuming. Providers may  
3 sometimes take time over decisions because the issues are novel or complex or because they  
4 are uncertain or confused, but, in principle, such decisions can be made instantaneously.

5 Organization of Work. This term is used in health facility survey reports to refer to the  
6 distribution of primary responsibility for the performance of a subset of routine tasks between  
7 IMCI-trained providers and other categories of clinical staff.

8 Time Required to Perform Tasks with No Minimum Duration. The time required to  
9 perform tasks with no minimum duration is the observed duration of consultations less the time  
10 spent performing tasks with pre-defined minimum durations divided by the number of tasks  
11 with no minimum duration. Where necessary, this is adjusted for the Hawthorne effect.

## 12 **Data**

13 Health Issues. Data on the prevalence of health issues, IMCI classifications, and ancillary  
14 findings on clinical signs come from gold-standard findings reported in studies of the validity  
15 and impact of IMCI, evaluations of the clinical signs used in the care of infants, and health  
16 facility surveys. Gold-standard findings are based on direct examinations of patients by  
17 researchers. In one case, information on malnutrition comes from a contemporaneous  
18 household survey.

19 Most of the studies used here were located by searching MEDLINE, the database of the  
20 International Network for Rational Use of Medicines, the websites of the WHO and its regional  
21 offices, and GOOGLE SCHOLAR. Search terms included 'Integrated Management of Childhood  
22 Illness', 'IMCI', 'observational', 'prospective', 'classification', 'clinical signs', 'health facility survey',

1 and 'validity'. Additional studies were identified by locating and reviewing work listed by  
2 GOOGLE SCHOLAR and other resources as citing a qualified study and, conversely, work  
3 included in the bibliographies of qualified studies.

4 Tasks and Triggering Conditions. Data on IMCI tasks come from relevant versions of the  
5 IMCI clinical algorithm. These were located using GOOGLE and GOOGLE SCHOLAR. Most of the  
6 world is covered by one or another generic version. Only a relatively small number of countries  
7 have produced their own adaptations. The key links between classification profiles and IMCI  
8 algorithms are the country in which, and the years during which, the information used in a  
9 classification profile was obtained.

10 In the IMCI algorithm, clinical tasks and the conditions that elicit them are indicated by a  
11 subset of sentences using imperative verbs that direct providers to carry out specific activities  
12 (see TEXT S3\_NOTES ON THE IDENTIFICATION OF IMCI TASKS). Nearly all these sentences occur  
13 in Chapter 2 and Parts II-III of the IMCI handbook [25] and in the sections of chart booklets  
14 concerned with assessing, classifying, and treating infants <2 months old and children 2-59  
15 months old (see column J, WORKBOOK S1\_STUDIES USED).

16 Time Required to Perform Tasks with No Minimum Duration. The information used to  
17 estimate the mean time required to perform a task with no pre-defined minimum duration,  
18 comes from a subset of the studies used to construct classification profiles plus a paper  
19 comparing direct observation and simulated client surveys of IMCI services in Benin [26].

20 Ancillary Information on Performance of Tasks by Someone other than Provider. Where  
21 it is available, this information comes from the studies that also report the prevalence of health  
22 issues. It is based on direct observation of clinical interactions.



## 1 **Analysis**

2           The mean expected durations of initial IMCI consultations for each patient population  
3 examined were obtained by means of the following steps (for additional details, see TEXT  
4 S1\_NOTES ON METHODOLOGY).

- 5     • First, construct the population's classification profile.
- 6     • Second, list all possible combinations of classifications and other health issues included in  
7       each classification profile, together with their probabilities.
- 8     • Third, calculate the prevalence of larger and smaller sets of co-occurring health issues.
- 9     • Fourth, identify the clinical tasks provided by each version of the IMCI algorithm and their  
10      performance conditions.
- 11    • Fifth, tabulate the number and kind of tasks required by each combination of classifications  
12      and other health issues were obtain by applying the relevant task performance conditions  
13      to the list of combinations, taking into account, where it is available, ancillary findings on  
14      clinical signs and the organization of work.
- 15    • Sixth, estimate the average time needed to complete a task with no minimum duration. NB:  
16      this was done once; the estimate was used for all patient populations.
- 17    • Seventh, calculate the expected duration of each combination of classifications and other  
18      indicators of health status by applying, as appropriate, the pre-defined minimum duration  
19      or the estimated time needed to perform tasks with no minimum duration to the required  
20      tasks.
- 21    • Eighth, calculate the content of the mean consultation in terms of the following categories:  
22      mandatory tasks with no minimum duration, mandatory tasks with a pre-defined minimum

1 duration, conditional assessments with no minimum duration, conditional assessments with  
2 a pre-defined minimum duration, and treatment and counseling tasks.

3 • Finally, the expected duration for each patient population is the mean duration of all  
4 combinations weighted by their probabilities. The distribution of durations within each  
5 population also was determined.

## 6 **RESULTS**

### 7 **Study Selection**

8 Forty-seven observational studies of initial primary care consultations for children less  
9 than 5 years old report gold standard IMCI classifications, clinical signs, and/or disease  
10 diagnoses. Nine of these studies had to be excluded. Two use disease categories without  
11 indicating how these map on to IMCI classifications [27, 28]. One reports the prevalence of  
12 several IMCI symptoms but not the relevant classifications [29]. Three fail to report mild  
13 classifications for two or more symptoms and/or to distinguish among severe, moderate, and  
14 mild classifications [30-32]. Two studies report on very small subsets of classifications [31, 33].  
15 One reports classifications for persistent diarrhea and dysentery but fails to mention  
16 dehydration [34]. A study from Nigeria [35] appears to assume that no child has more than 1  
17 gold standard classification.

### 18 **Study Characteristics**

19 Thirty-eight studies contain relatively complete information on the incidence of health  
20 issues. The studies were carried out between 1993 and 2017. Nine were in India; 4 in  
21 Bangladesh; 3 in Kenya; 2 each in Afghanistan, South Africa, and Tanzania, and 1 each in Benin,  
22 Bolivia, Botswana, Brazil, Burkina Faso, Cambodia, China, Egypt, Ethiopia, Gambia, Ghana,

1 Morocco, Sudan, Uganda, Vietnam, and Zimbabwe. Since the Cambodia study includes infants  
2 <2 months old as well as children 2-59 months old, the 38 studies contain data on 39 distinct  
3 patient populations (WORKBOOK S1\_STUDIES USED).

4 Each patient population is identified by an expression consisting of the standard three-  
5 letter abbreviation of the name of the country in which it was carried out, a 2-digit number to  
6 distinguish among studies done in the same country, and either 'I' or 'C', depending on the age  
7 group observed. For example, the 1993-94 IMCI validation survey in Kenya is identified as  
8 'KEN\_01\_C'.

9 Twelve of the patient populations consist of infants <2 months old. Twenty-seven consist  
10 of children 2-59 months old. For infants, the number of consultations observed ranges from 34  
11 to 1268. For children the range is from 98 to 3200.

12 The original generic IMCI algorithm, in use between 1995 and 2005, applies to 7 of the  
13 12 infant populations. The 2003/2009 India adaptation applies to the remaining 5. The 1995-  
14 2005 generic version covers all the health issues seen in 14 of the child populations and most of  
15 the issues seen in BWA\_01\_C, KHM\_01\_C, and VNM\_01\_C. National or provincial adaptations  
16 apply to AFG\_01\_C, AFG\_02\_C, BFA\_01\_C, EGY\_01\_C, IND\_01\_C, MAR\_01\_C, and ZAF\_02\_C.  
17 The 2008 generic version applies to CHN\_01\_C. It is assumed that the 2002 KwaZulu-Natal  
18 adaptation applies to HIV status in BWA\_01\_C and to all classifications in ZWE\_01\_C. It also is  
19 assumed that the Timor-Leste adaptation applies to dengue in KHM\_01\_C and VNM\_01\_C.

20 In 30 of the classification profiles, all the classifications and findings came directly from  
21 the studies used. IND\_01\_C, IND\_03\_C, and IND\_08\_C also required using local knowledge of  
22 the relationships between disease diagnoses and IMCI classifications. BOL\_01\_I, GHN\_01\_I,

1 IND\_02\_I, IND\_03\_I, KEN\_01\_I, and ZAF\_01\_I were constructed, in part, by applying the  
2 relevant IMCI algorithms to reported clinical signs. BOL\_01\_I, GHN\_01\_I, IND\_02\_I, IND\_03\_I,  
3 and ZAF\_01\_I also required using information on the need for referral. Figures for ‘severe  
4 malnutrition’ and ‘very low weight’ in TZN\_01\_C come from a contemporaneous household  
5 survey in the same region. (For additional details, see Text S2\_NOTES ON THE CONSTRUCTION  
6 OF CLASSIFICATION PROFILES.)

7 Information on the observed duration of consultations and task performance rates  
8 comes from the studies used to construct the profiles for BRA\_01\_C, KEN\_03\_C, MAR\_01\_C,  
9 SDN\_01\_C, and TZN\_01\_C. A study comparing the results of conspicuous observation and  
10 simulated client surveys in Benin [26] also provides a measure of observer effects (see  
11 Workbook S8).

## 12 **Health Issues**

13 The infants and children in the 39 populations examined here presented with multiple  
14 health issues. The approach used here ignores missing information, and counts ‘other  
15 problems’, where they are noted, as a single issue.

16 In the infant populations, the number of issues per patient ranges from a low of 0.84 in  
17 KHM\_01\_I to a high of 2.48 in IND\_06\_I with a weighted average of 1.40 (Table 1.1). The  
18 probability that an infant presents with at least 1 health issue ranges from 0.62 in KHM\_01\_I to  
19 0.97 in IND\_05\_I and IND\_06\_I (Figure 1.1). The probability that a patient presents with at least  
20 2 issues ranges from 0.19 in KHM\_01\_I to 0.81 in IND\_06\_I. In GHN\_01\_I and KEN\_02\_I, 1 in 50  
21 patients presents with at least 3 issues. Half of the patients do so in IND\_06\_I.

22

23

1 **Table 1.1** Health Issues in Infant Populations

2

| <b>PATIENT POPULATIONS</b> | <b>POSSIBLE BACTERIAL INFECTION</b> | <b>JAUNDICE</b> | <b>DIARRHEA</b> | <b>FEEDING PROBLEM OR LOW WEIGHT FOR AGE</b> | <b>OTHER PROBLEMS</b> | <b>MISSING IMMUNIZATION</b> | <b>TOTAL HEALTH ISSUES</b> |
|----------------------------|-------------------------------------|-----------------|-----------------|----------------------------------------------|-----------------------|-----------------------------|----------------------------|
| <b>BCD 01 I (N=234)</b>    | 0.58                                | N/R             | 0.07            | 0.31                                         | 0.16                  | NA                          | 1.11                       |
| <b>BOL 01 I (N=936)</b>    | 0.25                                | N/R             | 0.04            | 0.79                                         | 0.01                  | NA                          | 1.08                       |
| <b>GHN 01 I (N=535)</b>    | 0.50                                | N/R             | 0.04            | 0.04                                         | 0.40                  | NA                          | 0.99                       |
| <b>IND 02 I (N=1288)</b>   | 0.48                                | N/R             | 0.28            | 0.75                                         | 0.26                  | NA                          | 1.77                       |
| <b>IND 04 I (N=1288)</b>   | 0.01                                | 0.21            | 0.05            | 0.08                                         | 0.36                  | NA                          | 1.32                       |
| <b>IND 05 I (N=878)</b>    | 0.30                                | 0.13            | 0.05            | 0.94                                         | 0.23                  | NA                          | 1.05                       |
| <b>IND 06 I (N=419)</b>    | 0.55                                | 0.31            | 0.13            | 0.08                                         | 0.28                  | 0.53                        | 2.48                       |
| <b>IND 07 I (N=117)</b>    | 0.21                                | 0.08            | 0.08            | 0.70                                         | 0.38                  | NA                          | 1.52                       |
| <b>IND 09 I (N=500)</b>    | 0.35                                | 0.19            | 0.08            | 0.38                                         | 0.15                  | 0.14                        | 1.08                       |
| <b>KEN 02 I (N=897)</b>    | 0.74                                | N/R             | 0.05            | 0.39                                         | 0.08                  | NA                          | 1.05                       |
| <b>KHM 01 I (N=14)</b>     | 0.24                                | N/R             | 0.29            | 0.23                                         | 0.09                  | NA                          | 0.84                       |
| <b>ZAF 01 I (N=864)</b>    | 0.32                                | N/R             | NA              | 0.28                                         | 0.32                  | NA                          | 0.81                       |
| <b>MINIMUM</b>             |                                     |                 |                 |                                              |                       |                             | 0.64                       |
| <b>MAXIMUM</b>             |                                     |                 |                 |                                              |                       |                             | 2.48                       |
| <b>WEIGHTED AVERAGE</b>    |                                     |                 |                 |                                              |                       |                             | 1.40                       |

3  
4

5 Source: WORKBOOK S2\_CLASSIFICATION PROFILES FOR INFANT POPULATIONS

6

7 In the child populations, the number of health issues per patient ranges from 1.47 in  
8 IND\_09\_C to 3.84 in EGY\_01\_C with a mean of 2.44 (Table 1.2). The probability that a child  
9 presents with a least 1 issue ranges from 0.81 in IND\_08\_C to 1.00 in ZWE\_01\_C (Figure 1.2).

10 The probability that a patient presents with at least 2 issues ranges from 0.45 in  
11 IND\_08\_C to 0.94 in TZN\_02\_C. The probability that patients present with at least 3 issues  
12 ranges from 0.14 in BFA\_01\_C and ETH\_01\_C to 0.78 in TZN\_02\_C. The probability that patients  
13 present with at least 5 issues ranges from 0.02 in BFA\_01\_C and ETH\_01\_C to 0.40 in TZN\_02\_C.  
14 In 16 of the child populations at least 1 in 50 patients present with 5 or more issues.

15 The kinds of issues presented vary widely from one population to another. The focus  
16 here is on issues that are used in all the populations in each age group and that are reported in  
17 all or nearly all cases. To save space, they are grouped by symptom rather than classification.

1 **Figure 1.1** Probability of Multiple Health Issue in Infant Populations

2

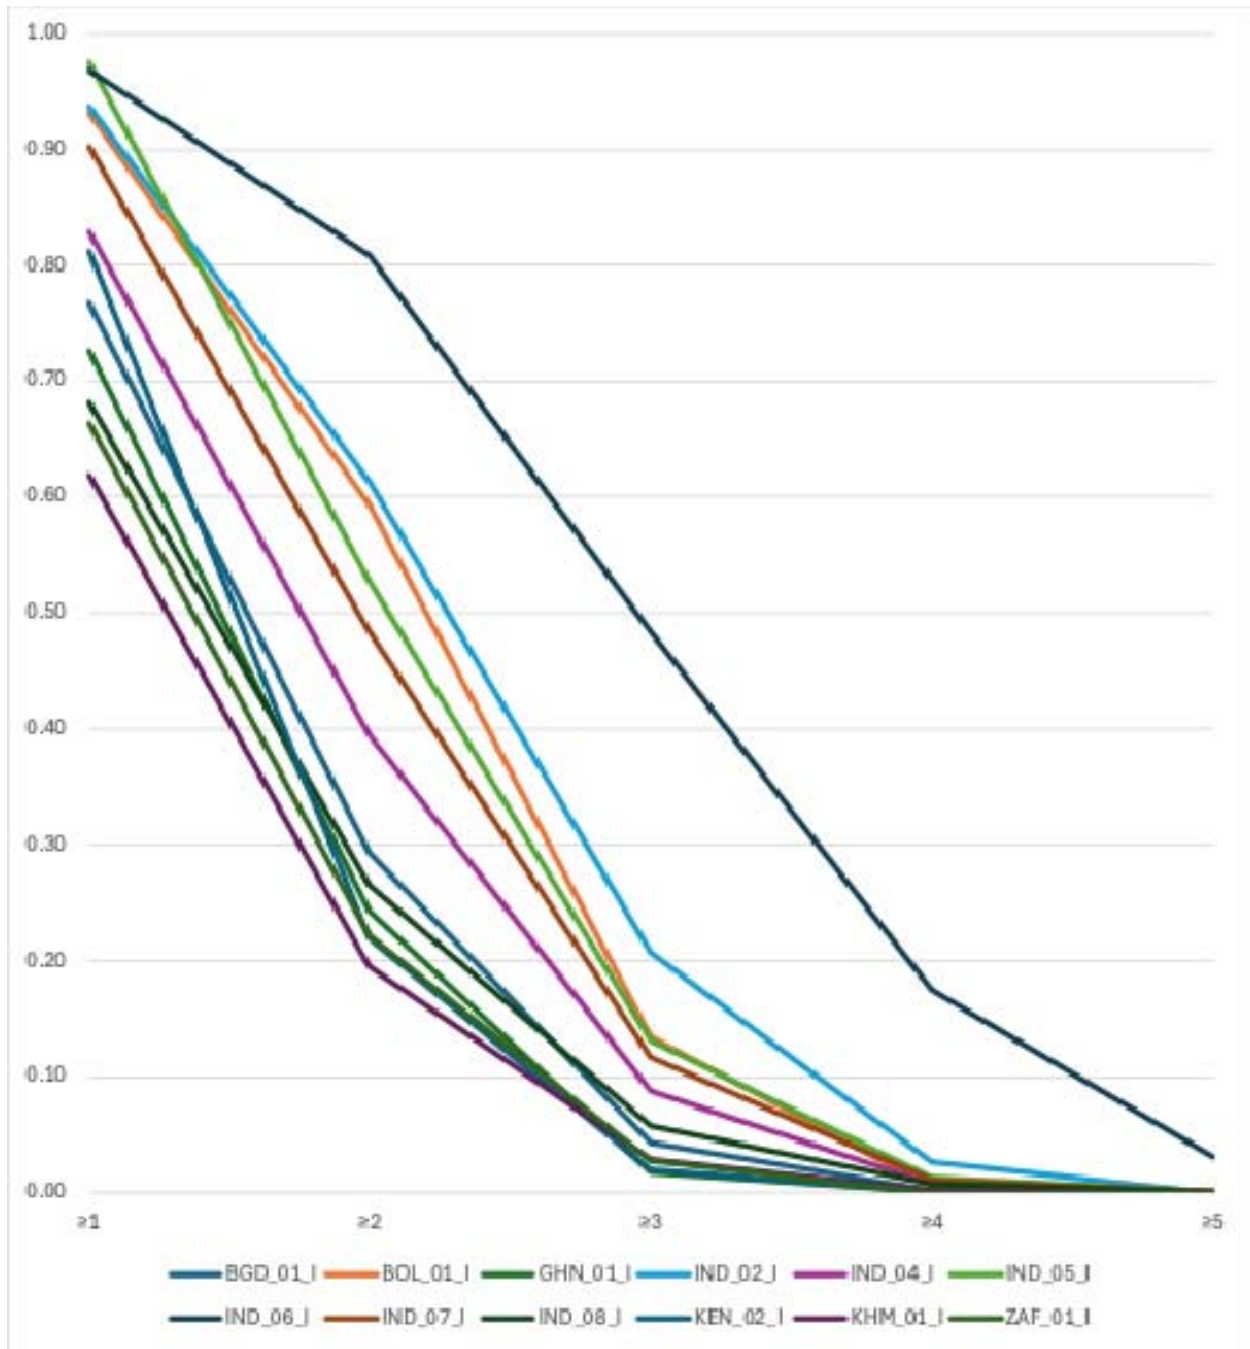

3

4

5 Source: WORKBOOK S2\_CLASSIFICATION PROFILES FOR INFANT POPULATIONS

6

7

8

1 **Table 1.2** Health Issues in Child Populations

| Issue | Fever | Ear Problem | Throat Problem | Malnutrition | Anemia | Other Problems | Vision | New HIV Assessment | Well |
|-------|-------|-------------|----------------|--------------|--------|----------------|--------|--------------------|------|
| 052   | 0.05  | 0.25        | 2.03           | 0.23         | 0.01   | NA             | NA     | N/R                |      |
| 026   | 0.05  | 0.24        | 2.07           | 0.22         | 0.01   | 2.02           | NA     | N/R                |      |
| 013   | 0.05  | 0.05        | N/R            | 0.23         | 0.26   | NA             | 0.02   | N/R                |      |
| 077   | 0.00  | NA          | N/R            | 0.13         | 0.06   | NA             | NA     | N/R                |      |
| 019   | 0.79  | 0.16        | N/R            | 0.28         | 0.16   | 2.21           | NA     | N/R                |      |
| 030   | 0.73  | 0.07        | N/R            | 0.31         | 0.01   | 2.20           | NA     | N/R                |      |
| 024   | 0.72  | 0.0         | N/R            | 0.29         | 0.03   | 2.16           | NA     | N/R                |      |
| 032   | 0.28  | 0.04        | N/R            | 0.21         | 0.01   | 2.51           | 0.31   | N/R                |      |
| 022   | 0.40  | 0.06        | N/R            | 0.28         | 0.02   | NA             | 0.06   | 0.22               |      |
| 033   | 0.22  | 0.00        | N/R            | 0.21         | 0.06   | 2.09           | NA     | N/R                |      |
| 034   | 0.63  | 0.16        | 2.26           | 0.26         | 0.27   | 2.16           | 0.05   | N/R                |      |
| 006   | 0.04  | 0.14        | N/R            | 0.23         | 0.00   | 2.13           | NA     | N/R                |      |
| 041   | 0.83  | 0.06        | N/R            | 0.23         | 0.03   | 2.24           | NA     | N/R                |      |
| 029   | 0.03  | 0.04        | N/R            | 0.25         | 0.21   | 2.17           | 0.16   | N/R                |      |
| 030   | 0.54  | 0.03        | N/R            | 0.22         | 0.06   | 2.02           | NA     | N/R                |      |
| 015   | 0.15  | 0.03        | N/R            | 0.29         | 0.15   | 2.41           | 0.16   | N/R                |      |
| 038   | 0.83  | 0.10        | N/R            | 0.28         | 0.32   | 2.03           | NA     | N/R                |      |
| 036   | 0.87  | 0.02        | N/R            | 0.28         | 0.26   | NA             | NA     | N/R                |      |
| 040   | 0.01  | 0.02        | N/R            | 0.28         | 0.02   | 2.48           | 0.17   | N/R                |      |
| 021   | 0.02  | 0.05        | 2.08           | 0.25         | 0.07   | 2.10           | 0.11   | N/R                |      |
| 030   | 0.57  | 0.09        | N/R            | 0.27         | 0.17   | 2.11           | 0.21   | N/R                |      |
| 013   | 0.76  | 0.03        | N/R            | 0.40         | 0.22   | NA             | 0.23   | N/R                |      |
| 020   | 0.09  | 0.03        | N/R            | 0.22         | 0.21   | NA             | 0.06   | N/R                |      |
| 028   | 0.71  | 0.03        | N/R            | 0.54         | 0.40   | 2.05           | 0.39   | N/R                |      |
| 019   | 0.82  | 0.01        | N/R            | 0.27         | 0.09   | 2.01           | NA     | N/R                |      |
| 023   | 0.68  | 0.06        | N/R            | 0.41         | NA     | 2.41           | NA     | 0.31               |      |
| 033   | 0.54  | 0.03        | N/R            | 0.24         | 0.02   | 2.37           | NA     | 0.05               |      |

Sources:  
 WORKBOOK S3\_CLASSIFICATIONS PROFILES FOR CHILD POPULATIONS IN LMICs, WORKBOOK S4\_CLASSIFICATIONS PROFILES FOR CHILD POPULATIONS IN LMICs (PART 1), WORKBOOK S5\_CLASSIFICATION PROFILES FOR CHILD POPULATIONS IN LMICs (PART 2),

Probability of Multiple Health Issues in Child Populations

2  
3  
4  
5  
6

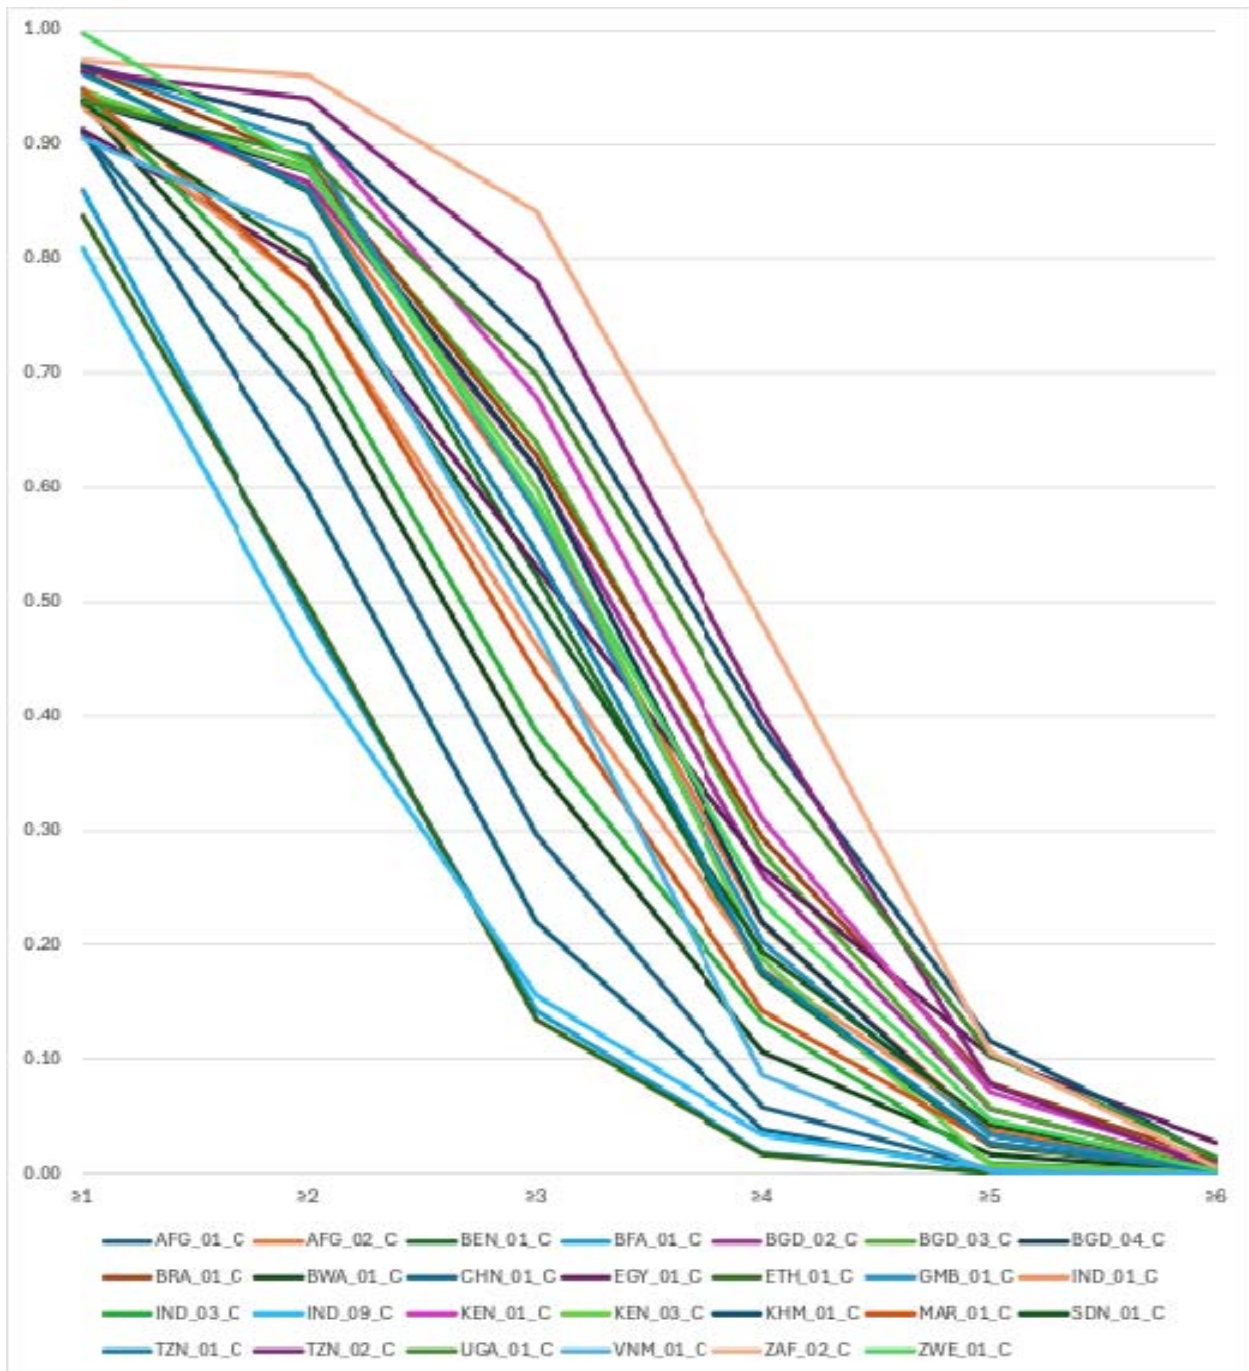

Sources: WORKBOOK S3\_CLASSIFICATIONS PROFILES FOR CHILD POPULATIONS IN UMICs,  
WORKBOOK S4\_CLASSIFICATIONS PROFILES FOR CHILD POPULATIONS IN LMICs (PART 1),  
WORKBOOK S5\_CLASSIFICATION PROFILES FOR CHILD POPULATIONS IN LMICs (PART 2),  
WORKBOOK S6\_CLASSIFICATION PROFILES FOR CHILD POPULATIONS IN LICs

In the infant populations, the prevalence of 'possible bacterial infection' ranges from a  
low of 0.21 in IND\_07\_| to a high of 0.74 in KEN\_02\_| (Table 1.1). It is the most common issue in



1 6 populations. The prevalence of ‘feeding problem’ ranges from 0.04 in GHN\_01\_I to 0.94 in  
2 IND\_05\_I. It is the major issue in 5 populations. The prevalence of ‘diarrhea’ generally is lower  
3 but reaches 0.29 in KHM\_01\_I where classifications for ‘diarrhea’ are slightly more common  
4 than for ‘possible bacterial infection’ and ‘feeding problem’.

5 The most prevalent issues in the child populations are ‘cough and difficult breathing’ and  
6 ‘fever’ (Table 1.2). The prevalence of ‘cough and difficult breathing’ ranges from 0.33 in  
7 IND\_08\_C to 0.89 in BGD\_04\_C. It is the major issue in 13 populations. The prevalence of ‘fever’  
8 ranges from 0.04 in ETH\_01\_C to 0.93 in GMB\_01\_C. It is the major issue in 12 populations. The  
9 prevalence of ‘diarrhea’ ranges from 0.06 in ETH\_01\_C to 0.52 in AFG\_01\_C, where it is the  
10 second most frequent concern. The prevalence of ‘ear problem’ ranges from 0.00 in CHN\_01\_C  
11 to 0.25 in AFG\_01\_C. The prevalence of ‘malnutrition’ is usually quite low, but is  $\geq 0.40$  in  
12 KEN\_01\_C, TZN\_01\_C, and ZAF\_01\_C. The prevalence of ‘anemia’ ranges from 0.00 in  
13 ZWE\_01\_C to 0.81 in BRA\_01\_C, where it is the most frequent issue.

#### 14 **IMCI Tasks and their Triggers**

15 The applicable IMCI algorithms furnish health care providers with 50 or 53 tasks for use  
16 with infants <2 months old and 95-132 tasks for use with children 2-59 months old (Tables 2.1  
17 and 2.2). These tasks fall into three groups. Mandatory tasks are to be performed for all  
18 patients. Most conditional assessments are triggered by the results of mandatory assessments.  
19 In addition, 1 conditional assessment is triggered by the observation that a child is not awake.  
20 Another is to be performed by the provider if it has not previously been performed by intake  
21 staff. Treatment and counseling tasks are triggered by the results of mandatory or conditional

1 assessments and in most cases are performed only when the assessment and classification  
2 process has been completed.

3 Mandatory Tasks. The original generic version of the infant algorithm includes 24  
4 mandatory tasks: a greeting and 4 opening questions, 12 assessments for possible bacterial  
5 infection, 1 check for diarrhea, 4 assessments for nutritional status, and checks for  
6 immunization status and ‘other problems’. The India adaptations provide for 25 mandatory  
7 tasks, adding 1 assessment for jaundice, a condition treated in the generic algorithm as an  
8 ‘other problem’.

9 The original generic algorithm for children 2-59 months old provides 19 mandatory  
10 tasks: the 5 routine opening tasks, 3 assessments for the presence of danger signs, checks for  
11 each of the 4 ‘main symptoms’, 4 assessments for nutritional status, 1 assessment of  
12 immunization status, and a check for other problems. The number of mandatory tasks in  
13 subsequent algorithms ranges from a low of 18 in the India version to a high of 28 in the  
14 Burkina Faso version. Most of the tasks added in subsequent adaptations have to do with  
15 regional or historical differences in health issues. Throat problems are a concern in Afghanistan,  
16 Egypt, and Morocco (4 tasks). HIV is a concern in Botswana, KwaZulu-Natal, and Zimbabwe (4  
17 tasks). Dengue fever is a concern in Cambodia and Vietnam. To shorten wait times for very sick  
18 children, KwaZulu-Natal requires providers to ‘do rapid appraisal on all waiting children’ before  
19 each new consultation.

20 In principle, intake staff should weigh children 2-59 months old and take their  
21 temperatures with a thermometer before they are seen by the examining health worker [25]. In

22 **Table 2.1** IMCI clinical tasks for infants by algorithm

| TASK TYPE                                                             | TRIGGERING CONDITION(S)                                                                                                                                                                   | ALGORITHM           |                   |
|-----------------------------------------------------------------------|-------------------------------------------------------------------------------------------------------------------------------------------------------------------------------------------|---------------------|-------------------|
|                                                                       |                                                                                                                                                                                           | GENERIC (1997-2005) | INDIA (2001-2009) |
| Mandatory                                                             | None                                                                                                                                                                                      | 24                  | 25                |
| Conditional Assessments (Conditions Listed in Red Are Never Reported) | Initial Finding of Fast Breathing                                                                                                                                                         | 1                   | 1                 |
|                                                                       | Diarrhea                                                                                                                                                                                  | 5                   | 5                 |
|                                                                       | Urgent Referral to Hospital Not Required and at Least One of the Following: (1) Any Difficulty Feeding. (2) Breastfeeds <8 Times in 24 Hours. (3) Takes Any Other Food or Drinks. (4) Low | 1                   | 1                 |
| Treatment and Counseling                                              | See WORKBOOK S7                                                                                                                                                                           | 19                  | 19                |
| <b>TOTAL</b>                                                          |                                                                                                                                                                                           | <b>50</b>           | <b>53</b>         |

1  
2  
3  
4  
5

Source: Workbook S7\_IMCI Clinical Tasks (Infant Worksheet)

6 most cases, however, performance of these tasks by intake staff is not reported. In these  
7 circumstances, weighing the child and checking its temperature checks are treated as  
8 mandatory tasks for the health care provider and a thermometer is not required.

9 Conditional Assessments. The original generic infant algorithms and the Indian  
10 adaptations provide 3 sets of conditional assessments. An infant found to have fast breathing  
11 should have the breaths in one minute counted a second time. A history of diarrhea triggers five  
12 assessments. Providers should perform a 4-minute assessment of breastfeeding for an infant  
13 who does not require urgent referral to hospital, but does have difficulty feeding, is breastfed  
14 less than 8 times in 24 hours, receives other foods or drinks, and/or is low weight.

15 The original generic algorithm for children 2-59 months old includes 23 conditional



1 assessments: 4 for ‘cough or difficult breathing’, 6 for ‘diarrhea’, 6 for ‘fever’, 3 for ‘measles’, and  
2 4 for ‘ear problem’. The number of conditional assessments for these issues in subsequent  
3 algorithms ranges from a low of 25 to a high of 32.

4 Except for the original generic version, all versions of the IMCI algorithm referenced here  
5 include a check for lethargy or unconscious, but only in children who are not visibly awake.

6 Health facility surveys for Egypt, Morocco, and Sudan report how many children are  
7 weighed and have their temperature taken with a thermometer by intake staff [36-38]. In these  
8 circumstances, weighings and temperature checks become conditional assessments.

9 KHM\_01\_C and VNM\_01\_C include classifications for dengue fever, but the applicable  
10 1997-2005 generic algorithm provides no assessments related to this concern. Here it is  
11 assumed that the 7 conditional assessments for dengue included in the Timor-Leste algorithm  
12 are used in these settings.

13 The KwaZulu-Natal adaptation calls for 3 assessments to determine the HIV status of  
14 children who are not known to be HIV positive and who have at least 1 of the following: (1) a  
15 classification today of ‘pneumonia’, ‘persistent diarrhea’ or ‘not growing well’; or (2) an episode  
16 of ‘persistent diarrhea’ in last 3 months; or (3) discharge from ear at any time, or (4) ‘mother is  
17 HIV positive’.

18 Treatment and Counseling. Several of the treatment and counseling tasks provided in  
19 the relevant algorithms had to be modified before they could be used in this analysis. Three  
20 treatment options are provided for infants and children with ‘severe dehydration’. If a provider  
21 is adequately trained and if the clinic in which she works has the necessary supplies, the  
22 preferred Plan C option is to administer Ringer’s Lactate Solution or normal saline solution for 6

1 hours, with reassessment and adjustment every 1 or 2 hours [25]. If IV treatment cannot be  
2 provided locally or nearby, a second option is to administer ORS solution by mouth, if the infant  
3 can drink, or, if the infant is unable to drink and the provider is properly trained, by naso-gastric  
4 tube, again for 6 hours with regular reassessment. If none of these conditions can be met, the  
5 patient should be referred urgently to hospital for IV or naso-gastric rehydration. Given the  
6 constraints of training, equipment, and supplies, it is likely that the last option is the  
7 predominant first choice. In any case, it is impossible to know how, in fact, such patients are  
8 treated.

9 In the child algorithms that include measles, children with the classification ‘measles  
10 with eye or mouth complications’ have ‘pus draining from the eye’ and/or ‘mouth ulcers’. The  
11 algorithms provide treatments for each condition, but the observational studies report only the  
12 less specific classification. This problem is dealt with by replacing the specific treatments with  
13 ‘treat the complications of measles’.

14 In addition, a few treatment and counseling tasks provided for infants are triggered by  
15 feeding problems the occurrence of which is not fully reported. In this study, those tasks are  
16 replaced by ‘counsel mother about feeding issues, thrush, and/or keeping low weight infant  
17 warm’.

18 With these modifications, the relevant IMCI algorithms provide 19 or 22 treatment and  
19 counseling tasks for infants and 30-42 for children. Most of the differences relate to the  
20 presence or absence of health issues. The KwaZulu-Natal adaptation includes 6 tasks related  
21 HIV. The Egypt and Morocco adaptations exclude tasks related to malaria. Treatment for dengue  
22 fever may be required in KHM\_01\_C and VNM\_01\_C. Morocco also adds two counseling tasks:

1 'counsel mother on how to stimulate the psychosocial development of her child' and 'counsel  
2 the mother on hygiene'.

### 3 **Tasks per Patient**

4 The number of expected tasks per patient for each population is obtained by linking its  
5 classification profile and any ancillary information to the task triggers found in the applicable  
6 version of the IMCI algorithm. In the infant populations, the number of expected tasks per  
7 patient ranges from a low of 28.1 in ZAF\_01\_I to a high of 31.1 in IND\_02\_I with a mean of 29.9  
8 (Table 3.1). In the child populations, the range is much greater, reaching from a low of 26.6 in  
9 IND\_09\_C to a high of 46.2 in BFA\_01\_C (Table 3.2). The mean is 37.2.

### 10 **Minutes per Task**

11 Tasks with Prescribed Minimum Durations. Three IMCI tasks expected have prescribed minimum  
12 durations. To assess an infant's breastfeeding, a provider must "ask the mother to put her infant  
13 to the breast" and "observe the breastfeed for" a minimum of "4 minutes" [25]. Taking a  
14 temperature with a thermometer requires at least 2 minutes [36]. Checking for fast breathing  
15 requires at least 1 minute [25].

16 Tasks without Prescribed Minimum Durations. Table 4 provides an estimate of the time  
17 needed to perform tasks with no minimum duration. Two of the patient populations on which  
18 this estimate is based require no correction for the presence of an observer. In the Benin  
19 simulated client survey, the observer was disguised as the patient's caretaker [26]. In BRA\_01\_C,  
20 providers were followed, where possible, for a 5-day working week and no difference was found  
21 in the duration of consultations between the first and subsequent days [39]. In the other cases,  
22 the minutes required to perform a task with no minimum duration are corrected for the effects

1 **Table 3.1** Number of expected tasks in infant populations

| POPULATION | TASK CATEGORY                 |                                            |                                            |                                              |                          | TOTAL |
|------------|-------------------------------|--------------------------------------------|--------------------------------------------|----------------------------------------------|--------------------------|-------|
|            | Mandatory No Minimum Duration | Mandatory Check for Fast Breathing (1 Min) | Conditional Assessment No Minimum Duration | Conditional Assessment Breastfeeding (4 min) | Treatment and Counseling |       |
| BDG 01 I   | 23                            | 1                                          | 0.3                                        | 0.1                                          | 3.9                      | 28.4  |
| BOL 01 I   | 23                            | 1                                          | 0.2                                        | 0.8                                          | 8.1                      | 30.9  |
| GHN 01 I   | 23                            | 1                                          | 0.2                                        | 0.0                                          | 5.0                      | 29.2  |
| IND 02 I   | 23                            | 1                                          | 1.4                                        | 0.4                                          | 5.3                      | 31.1  |
| IND 04 I   | 24                            | 1                                          | 0.3                                        | 0.0                                          | 4.6                      | 30.0  |
| IND 05 I   | 24                            | 1                                          | 0.2                                        | 0.8                                          | 4.9                      | 30.0  |
| IND 06 I   | 24                            | 1                                          | 0.8                                        | 0.3                                          | 4.6                      | 30.5  |
| IND 07 I   | 24                            | 1                                          | 0.4                                        | 0.8                                          | 4.7                      | 30.7  |
| IND 09 I   | 24                            | 1                                          | 0.4                                        | 0.1                                          | 4.1                      | 29.6  |
| KEN 02 I   | 23                            | 1                                          | 0.2                                        | 0.0                                          | 4.1                      | 28.4  |
| KHM 01 I   | 23                            | 1                                          | 1.5                                        | 0.2                                          | 5.1                      | 30.0  |
| ZAF 01 I   | 23                            | 1                                          | 0.9                                        | 0.2                                          | 3.9                      | 28.1  |

2  
3

4 Source: WORKBOOK S2\_CLASSIFICATION PROFILES FOR INFANT POPULATIONS

5

6 of an observer on task performance rates and on the pace of task performance, i.e. minutes

7 used per task. The coefficients used to correct for observer effects are derived from a

8 comparison of BENIN\_CO and BENIN\_SC (see columns P-R in the first worksheet in WORKBOOK

9 S8.)

10 The mean time required by IMCI-trained providers to perform tasks with no minimum

11 duration ranges from ranges from 0.2 minutes in TZN\_01\_C to 1.4 minutes in BENIN\_CO and

12 BENIN\_SC. In none of these cases are providers doing satisfactory work. Performance rates for

13 mandatory tasks, corrected for observer effects where necessary, range from 0.5 in SDN\_01\_C

14 to 0.7 in TZN\_01\_C. Performance rates for conditional tasks are consistently worse, ranging



1 Table 3.2 Number of expected tasks in child populations

| POPULATION | TASK CATEGORY                          |                                                      |                                                                              |                                                                     |                                | TOTAL |
|------------|----------------------------------------|------------------------------------------------------|------------------------------------------------------------------------------|---------------------------------------------------------------------|--------------------------------|-------|
|            | Mandatory<br>No<br>Minimum<br>Duration | Conditional<br>Assessments<br>No Minimum<br>Duration | Conditional<br>Assessment<br>Take<br>Temperature with<br>Thermometer (2 min) | Conditional<br>Assessment<br>Check for Fast<br>Breathing (1<br>Min) | Treatment<br>and<br>Counseling |       |
| AFG #1 G   | 23                                     | 0.0                                                  | NA                                                                           | 0.5                                                                 | 0.5                            | 39.7  |
| AFG #2 G   | 23                                     | 0.2                                                  | NA                                                                           | 0.9                                                                 | 7.7                            | 40.9  |
| BFN #1 G   | 79                                     | 79                                                   | NA                                                                           | 0.5                                                                 | 0.4                            | 31.7  |
| BFA #1 G   | 29                                     | 1.2                                                  | NA                                                                           | 0.4                                                                 | 0.6                            | 48.2  |
| BGD #2 G   | 39                                     | 0.0                                                  | NA                                                                           | 0.7                                                                 | 0.9                            | 37.4  |
| BGD #3 G   | 39                                     | 0.1                                                  | NA                                                                           | 0.8                                                                 | 0.5                            | 37.4  |
| BGD #4 G   | 39                                     | 0.0                                                  | NA                                                                           | 0.9                                                                 | 0.2                            | 37.1  |
| BRA #1 G   | 39                                     | 1.4                                                  | NA                                                                           | 0.5                                                                 | 10.3                           | 15.2  |
| BWA #1 G   | 23                                     | 0.3                                                  | NA                                                                           | 0.5                                                                 | 7.3                            | 37.1  |
| CHN #1 G   | 39                                     | 1.2                                                  | NA                                                                           | 0.5                                                                 | 7.0                            | 31.7  |
| EGY #1 G   | 23                                     | 0.1                                                  | 0.0                                                                          | 0.8                                                                 | 0.0                            | 40.9  |
| ETH #1 G   | 39                                     | 1.0                                                  | NA                                                                           | 0.6                                                                 | 7.2                            | 29.0  |
| GMB #1 G   | 39                                     | 10.0                                                 | NA                                                                           | 0.9                                                                 | 0.9                            | 17.8  |
| IND #1 G   | 39                                     | 0.1                                                  | NA                                                                           | 0.7                                                                 | 5.6                            | 34.4  |
| IND #3 G   | 39                                     | 0.0                                                  | NA                                                                           | 0.4                                                                 | 0.1                            | 32.5  |
| IND #9 G   | 39                                     | 1.4                                                  | NA                                                                           | 0.3                                                                 | 4.9                            | 20.6  |
| KEN #1 G   | 39                                     | 10.7                                                 | NA                                                                           | 0.9                                                                 | 0.2                            | 10.8  |
| KEN #3 G   | 39                                     | 0.0                                                  | NA                                                                           | 0.7                                                                 | 0.0                            | 37.4  |
| KHM #1 G   | 39                                     | 0.4                                                  | NA                                                                           | 0.8                                                                 | 0.7                            | 37.7  |
| MLI #1 G   | 23                                     | 0.9                                                  | 0.4                                                                          | 0.6                                                                 | 3.2                            | 43.0  |
| SDN #1 G   | 39                                     | 10.1                                                 | 1.0                                                                          | 0.6                                                                 | 0.4                            | 40.1  |
| TZN #1 G   | 39                                     | 7.2                                                  | NA                                                                           | 0.8                                                                 | 0.0                            | 35.0  |
| TZN #2 G   | 39                                     | 7.1                                                  | NA                                                                           | 0.8                                                                 | 0.5                            | 39.2  |
| USA #1 G   | 39                                     | 0.4                                                  | NA                                                                           | 0.7                                                                 | 0.1                            | 39.2  |
| VRM #1 G   | 39                                     | 12.0                                                 | NA                                                                           | 0.6                                                                 | 0.4                            | 30.0  |
| ZAF #2 G   | 25                                     | 10.1                                                 | NA                                                                           | 0.8                                                                 | 0.1                            | 45.1  |
| ZWE #1 G   | 25                                     | 10.0                                                 | NA                                                                           | 0.7                                                                 | 5.9                            | 42.5  |

2  
3  
4 Sources: WORKBOOK S3\_CLASSIFICATIONS PROFILES FOR CHILD POPULATIONS IN UMICs,  
5 WORKBOOK S4\_CLASSIFICATIONS PROFILES FOR CHILD POPULATIONS IN LMICs (PART 1),  
6 WORKBOOK S5\_CLASSIFICATION PROFILES FOR CHILD POPULATIONS IN LMICs (PART 2),  
7 WORKBOOK S6\_CLASSIFICATION PROFILES FOR CHILD POPULATIONS IN LICs  
8

1 from 0.3 in BRA\_01\_C to 0.5 in KEN\_01\_C. Substantial numbers of children are incorrectly  
2 and/or incompletely classified. In the populations for which data are available, between 7.3 and  
3 37.4 percent of children are prescribed an unnecessary antibiotic.

4 Lacking a larger sample or a model case, 0.58 minutes, the geometric average of the 7  
5 cases weighted by the number of performance occasions observed, may be taken as a  
6 reasonable first approximation of the time required to perform the average IMCI task with no  
7 specified duration. No great store should be set by this figure. However, it probably is not so  
8 high that program managers using it would be expecting too little of providers nor so low that  
9 they would be expecting providers to perform miracles of speed and efficiency.

#### 10 **Expected Duration of Consultations**

11 IMCI consultations require substantial amounts of time (Tables 5.1 and 5.2). For the  
12 infant populations, the mean expected duration ranges from 17.1 minutes in KEN\_02\_I to 20.5  
13 minutes in IND\_05\_I. The average over all the infant populations is 18.7 minutes. For  
14 populations of children 2-59 months old, the range is from a low of 15.5 minutes in IND\_09\_C to  
15 a high of 26.4 minutes in BFA\_01\_C, with an average of 21.7.

16 The shortest IMCI consultations take 16.1 or 16.7 minutes in the infant populations and  
17 11.0 to 16.2 minutes in the child populations. This floor is determined in large part by the  
18 provision of mandatory tasks. In the original generic algorithm for infants and in the India  
19 version, these tasks are expected to take 13.9 and 14.5 minutes respectively. In the child  
20 populations, the mandatory tasks included in the India version of algorithm are expected to take  
21 10.4 minutes. This figure rises to 11.0 in the generic versions, 12.2 in the Sudan version, 13.3 in  
22 **Table 4** Mean minutes per task with no minimum duration weighed by task occasions observed

| <b>PANEL 1: MINUTES PER TASK WITH NO MINIMUM DURATION</b> |                               |                                                                   |                                                                          |                                            |                                                                                              |
|-----------------------------------------------------------|-------------------------------|-------------------------------------------------------------------|--------------------------------------------------------------------------|--------------------------------------------|----------------------------------------------------------------------------------------------|
| <b>PATIENT POPULATION</b>                                 | <b>CONSULTATIONS OBSERVED</b> | <b>NUMBER OF TASKS WITH NO MINIMUM DURATION INCLUDED IN STUDY</b> | <b>PERFORMANCES OF TASKS WITH NO MINIMUM DURATION OBSERVED PER CHILD</b> | <b>TOTAL TASK OCCASIONS OBSERVED (B*D)</b> | <b>MINUTES PER TASK WITH NO MINIMUM DURATION (CORRECTED FOR RATE AND PACE, IF NECESSARY)</b> |
| BENIN (CO)                                                | 87                            | 19                                                                | 14.6                                                                     | 1274                                       | 1.4                                                                                          |
| BENIN (SC)                                                | 23                            | 19                                                                | 9.6                                                                      | 222                                        | 1.4                                                                                          |
| BRA_01_C                                                  | 295                           | 14                                                                | 9.9                                                                      | 2907                                       | 0.5                                                                                          |
| KEN_03_C                                                  | 553                           | 32                                                                | 27.5                                                                     | 15220                                      | 0.7                                                                                          |
| MAR_01_C                                                  | 397                           | 38                                                                | 23.7                                                                     | 9400                                       | 0.5                                                                                          |
| SDN_01_C                                                  | 282                           | 28                                                                | 16.4                                                                     | 4636                                       | 0.8                                                                                          |
| TZN_01_C                                                  | 231                           | 21                                                                | 18.1                                                                     | 4186                                       | 0.3                                                                                          |
| GEOMETRIC MEAN                                            |                               |                                                                   |                                                                          |                                            | 0.6                                                                                          |

| <b>PANEL 2: QUALITY OF PROVIDER PERFORMANCE</b> |                                                                         |                                                 |                                                                                                 |                                                              |  |
|-------------------------------------------------|-------------------------------------------------------------------------|-------------------------------------------------|-------------------------------------------------------------------------------------------------|--------------------------------------------------------------|--|
| <b>PATIENT POPULATION</b>                       | <b>PERCENT OF PROVIDER CLASSIFICATIONS THAT MATCH THOSE OF SURVEYOR</b> | <b>PERCENT OF CHILDREN CORRECTLY CLASSIFIED</b> | <b>PERCENT OF CHILDREN GIVEN CORRECT SEVERE OR MODERATE CLASSIFICATIONS FOR 3 MAIN SYMPTOMS</b> | <b>PERCENT OF CHILDREN PRESCRIBED UNNECESSARY ANTIBIOTIC</b> |  |
| BENIN (CO)                                      | 69.5                                                                    |                                                 |                                                                                                 | NA                                                           |  |
| BENIN (SC)                                      | 43.0                                                                    |                                                 |                                                                                                 | NA                                                           |  |
| BRA_01_C                                        | NA                                                                      | 65.3                                            |                                                                                                 | 7.3                                                          |  |
| KEN_03_C                                        | 68.9                                                                    |                                                 |                                                                                                 | NA                                                           |  |
| MAR_01_C                                        | NA                                                                      |                                                 | 76.6                                                                                            | 23.6                                                         |  |
| SDN_01_C                                        | 49.1                                                                    |                                                 |                                                                                                 | 37.4                                                         |  |
| TZN_01_C                                        | NA                                                                      | 63.5                                            |                                                                                                 | 14.0                                                         |  |

1

2 Source: WORKBOOK S8 MINUTES PER TASK WITH NO MINIMUM DURATION

3

4 the Afghanistan and Egypt versions, 14.2 in the Morocco version, 14.5 in the Kwa Zulu-Natal

5 version, and 16.2 in the Burkina Faso version. The floor also includes a few treatment and

6 counseling tasks. For example, providers are to advise all mothers when to return and to

7 counsel them about their own health issues unless the patient requires urgent referral.

8 Depending on the case mix presented by the patient populations and the details of the relevant

9 algorithm, such tasks increase the minimum expected duration of consultations by 2.2 to 2.7

10 minutes for the infant populations and 0.6 to 2.9 minutes for the child populations.

1 Table 5.1 Expected duration of initial IMCI consultations in infant populations

| <b>PATENT POPULATION</b> | <b>MANDATORY</b> | <b>MINIMUM</b> | <b>WEIGHTED AVERAGE</b> | <b>98TH PERCENTILE</b> |
|--------------------------|------------------|----------------|-------------------------|------------------------|
| <b>KEN 02 I</b>          | <b>13.9</b>      | <b>13.7</b>    | <b>17.1</b>             | <b>21.5</b>            |
| <b>ZAF 01 I</b>          | <b>13.9</b>      | <b>13.1</b>    | <b>17.4</b>             | <b>21.6</b>            |
| <b>BGD 01 I</b>          | <b>13.9</b>      | <b>13.1</b>    | <b>17.4</b>             | <b>21.5</b>            |
| <b>GHN 01 I</b>          | <b>13.8</b>      | <b>13.7</b>    | <b>17.5</b>             | <b>22.2</b>            |
| <b>IND 08 I</b>          | <b>14.5</b>      | <b>13.7</b>    | <b>17.8</b>             | <b>22.6</b>            |
| <b>IND 04 I</b>          | <b>14.5</b>      | <b>13.7</b>    | <b>17.9</b>             | <b>22.5</b>            |
| <b>KHM 01 I</b>          | <b>13.9</b>      | <b>13.7</b>    | <b>18.9</b>             | <b>24.9</b>            |
| <b>IND 06 I</b>          | <b>14.5</b>      | <b>13.7</b>    | <b>19.0</b>             | <b>24.1</b>            |
| <b>IND 02 I</b>          | <b>13.9</b>      | <b>13.7</b>    | <b>19.9</b>             | <b>25.7</b>            |
| <b>IND 07 I</b>          | <b>14.5</b>      | <b>13.7</b>    | <b>20.3</b>             | <b>24.3</b>            |
| <b>BDL 01 I</b>          | <b>13.0</b>      | <b>13.7</b>    | <b>20.4</b>             | <b>25.8</b>            |
| <b>IND 05 I</b>          | <b>14.5</b>      | <b>13.7</b>    | <b>20.5</b>             | <b>25.3</b>            |
| <b>MINIMUM</b>           |                  |                | <b>17.1</b>             |                        |
| <b>MAXIMUM</b>           |                  |                | <b>20.5</b>             |                        |
| <b>WEIGHTED AVERAGE</b>  |                  |                | <b>18.7</b>             |                        |

2  
3  
4  
5

Source: WORKBOOK S2\_CLASSIFICATION PROFILES FOR INFANT POPULATIONS

6 Finally, consultations with much longer expected durations are not uncommon. In the  
7 infant populations, the 98<sup>th</sup> percentile of expected durations ranges from 21.5 minutes in  
8 BGD\_01\_I and KEN\_02\_I, where it is 4.1 or 4.4 minutes longer than the mean, to 25.7 minutes  
9 in IND\_02\_C, where it is 5.8 minutes longer than the mean. In the child populations, the 98<sup>th</sup>  
10 percentile of expected durations ranges from 22.5 minutes in IND\_08\_C, where it is 7.0 minutes  
11 longer than the mean, to 35.2 minutes in BFA\_01\_C, where it is 8.8 minutes longer than the  
12 mean. In other words, 1 in 50 consultations is likely to require substantially more time than the  
13 average.

14

1 Table 5.2 Expected duration of initial IMCI consultations in child populations

| PATIENT POPULATION | MANDATORY | MINIMUM | WEIGHTED AVERAGE | 98TH PERCENTILE |
|--------------------|-----------|---------|------------------|-----------------|
| IND 09 C           | 10.4      | 11.0    | 15.5             | 22.5            |
| ETH 01 C           | 11.0      | 12.2    | 17.2             | 23.0            |
| CHN 01 C           | 11.0      | 12.2    | 18.2             | 26.0            |
| IND 03 C           | 10.4      | 11.0    | 18.8             | 26.0            |
| BEN 01 C           | 11.0      | 12.2    | 19.6             | 26.3            |
| BRA 01 C           | 11.0      | 17.7    | 20.1             | 27.0            |
| IND 01 C           | 11.0      | 12.2    | 20.2             | 28.0            |
| TZN 01 C           | 11.0      | 12.2    | 20.6             | 27.0            |
| TZN 02 C           | 11.0      | 12.2    | 20.8             | 29.0            |
| USA 01 C           | 11.0      | 12.2    | 21.0             | 27.0            |
| BWA 01 C           | 13.3      | 14.5    | 21.3             | 29.3            |
| BGD 02 C           | 11.0      | 12.2    | 21.6             | 27.6            |
| KEN 03 C           | 11.0      | 12.2    | 21.6             | 27.4            |
| BGD 03 C           | 11.0      | 12.2    | 21.7             | 27.1            |
| KHM 01 C           | 11.0      | 12.2    | 21.7             | 27.1            |
| BGD 04 C           | 11.0      | 12.2    | 21.8             | 27.3            |
| VNM 01 C           | 11.0      | 12.2    | 21.9             | 29.0            |
| GHR 01 C           | 11.0      | 17.7    | 22.0             | 27.6            |
| KIN 01 C           | 11.0      | 12.2    | 22.4             | 27.8            |
| AFG 01 C           | 13.3      | 14.5    | 23.2             | 31.5            |
| AFG 02 C           | 13.3      | 14.5    | 23.7             | 31.2            |
| EGY 01 C           | 13.3      | 14.0    | 24.1             | 31.2            |
| SEN 01 C           | 12.2      | 15.0    | 24.3             | 32.3            |
| MAR 01 C           | 14.2      | 10.3    | 24.0             | 33.2            |
| ZAF 02 C           | 14.5      | 15.1    | 25.2             | 32.6            |
| ZWE 01 C           | 15.1      | 16.2    | 25.6             | 33.8            |
| BFA 01 C           | 16.2      | 17.4    | 26.4             | 35.2            |
|                    |           |         |                  |                 |
| MINIMUM            |           |         | 15.5             |                 |
| MAXIMUM            |           |         | 26.4             |                 |
| WEIGHTED AVERAGE   |           |         | 21.7             |                 |

2  
3  
4 Sources: WORKBOOK S3\_CLASSIFICATIONS PROFILES FOR CHILD POPULATIONS IN UMICs,  
5 WORKBOOK S4\_CLASSIFICATIONS PROFILES FOR CHILD POPULATIONS IN LMICs (PART 1),  
6 WORKBOOK S5\_CLASSIFICATION PROFILES FOR CHILD POPULATIONS IN LMICs (PART 2),  
7 WORKBOOK S6\_CLASSIFICATION PROFILES FOR CHILD POPULATIONS IN LICs

## 1 **DISCUSSION**

2           The expected duration of initial sick child visits in LMICs using the IMCI algorithm  
3 exceeds both our preconceptions and our experience. The PHCP anticipated that for some  
4 patients in resource-poor settings satisfactory consultations may take as little as 10 minutes [4].  
5 However, in the infant populations examined here, the shortest expected consultations exceed  
6 this figure by 6.1 or 6.7 minutes. In the child populations the shortest expected consultations  
7 exceed the PHCP floor by 1.0 to 7.4 minutes. The WHO suggested that the mean duration of  
8 initial consultations with sick children in primary care facilities using the IMCI algorithm would  
9 be 15 minutes [17]. However, in the infant populations examined here, the mean expected  
10 duration of consultations exceeds this figure by 2.1 to 5.5 minutes. In the child populations, the  
11 mean expected duration of consultations exceeds the WHO figure by 0.5 to 11.4 minutes.

12           With 1 exception, the mean expected durations of initial IMCI consultations also are  
13 greater than the mean observed durations. The exception is KEN\_03\_C where the observed  
14 duration is 24.8 minutes (see WORKBOOK S5) and the expected duration is 21.6 minutes (Table  
15 5.2). In this case, researchers judged the observer effect to be substantial. Providers “were  
16 clearly motivated to follow the IMCI guidelines while being observed ... Thirty-seven percent of  
17 health workers acknowledged spending more time than usual with patients because of the  
18 presence of the survey team” [40]. In the other studies for which both observed and expected  
19 durations are available, the expected duration exceeds the observed duration by 9.1 minutes  
20 (81.8%) in BRA\_01\_C, 12.9 minutes (107.3%) in MAR\_01\_C, 4.3 minutes (21.6%) in SDN\_01\_C,  
21 and 12.4 minutes (150.9%) in TZN\_01\_C (WORKBOOKS S3, S5 and S6 and Table 5.2).

## 22 **Limitations**

1 Missing Information. Research on IMCI services is a rich source for the investigation of the time  
2 needed to perform primary care consultations, but it is by no means perfect. A portion of the  
3 information needed to calculate the number of tasks required is missing. This information falls  
4 under 7 headings: classifications, 'other problems', vaccination status, age, clinical signs, the  
5 organization of work, and miscellaneous.

6       As regards classifications, in the infant populations information is missing for all  
7 classifications related to dehydration, persistent diarrhea, and dysentery in ZAF\_01\_I and for all  
8 classifications related to persistent diarrhea and dysentery in KEN\_02\_I. Information is missing  
9 on 'low body temperature' for all the populations in which it is relevant: IND\_04\_I, IND\_05\_I,  
10 IND\_06\_I, IND\_07\_I, IND\_08\_I, and IND\_09\_I. Nothing is reported for 'local bacterial infection'  
11 in KEN\_02\_I and ZAF\_01\_I or for 'some dehydration' in KEN\_02\_I.

12       In the child populations, no information is reported for any classifications related to the  
13 following: wheeze in MAR\_01\_C and ZAF\_01\_C; persistent diarrhea in BEN\_01\_C and  
14 TZN\_01\_C; dysentery in BEN\_01\_C; measles in BEN\_01\_C, TZN\_02\_C, and ZAF\_01\_C; ear  
15 problem in BFA\_01\_C, and anemia in ZAF\_01\_C. In addition, information is missing for the  
16 following individual classifications: 'severe pneumonia', 'severe dehydration' 'severe febrile  
17 disease', 'severe complicated measles', and 'severe anemia' in TZN\_01\_C, 'mastoiditis' in  
18 IND\_08\_C and TZN\_01\_C; 'chronic ear infection' in IND\_08\_C; 'severe anemia' in TZN\_01\_C;  
19 'symptomatic HIV unlikely' in BWA\_01\_C and ZWE\_01\_C, and '≠ symptomatic HIV assessment'  
20 in BWA\_01\_C.

21       Information on the prevalence of 'other problems' is reported for all infant populations  
22 but is almost certainly incomplete (for details, see TEXT S2\_NOTES ON THE CONSTRUCTION OF

1 CLASSIFICATION PROFILES). The only child populations for which information on ‘other  
2 problems’ appears to be complete and fully specified are CHN\_01\_C (3 conditions), ETH\_01\_C  
3 (7), GMB\_01\_C (8), IND\_01\_C (16), and IND\_03\_C (10). No information on the prevalence of  
4 ‘other problems’ is available for 10 of the 27 child populations. The figures for the remaining 12  
5 populations appear to be incomplete.

6 Information on vaccination status is missing for 10 of the 12 infant populations and for  
7 14 of the 27 child populations.

8 The incidence of children <2 years old is missing for 10 of the 27 child populations.

9 As regards clinical signs in infant populations, if a first, mandatory check of fasting  
10 breathing finds  $\geq 60$  breaths in 1 minutes, a second, conditional check for fast breathing is  
11 required. In the populations using the India infant algorithm, finding that a mother has pain  
12 while breastfeeding triggers checks for flat, inverted or sore nipples and for engorged breasts or  
13 breast abscesses. Neither of these findings is reported.

14 In the child populations, information is missing on the following clinical signs.

- 15 • In the Morocco algorithm as many as 7 conditional assessments are triggered by ‘wheeze’,  
16 ‘fast breathing’, and ‘chest indrawing’, but the prevalence of these signs is not reported.
- 17 • If a child has a very high fever, the provider should give paracetamol. However, the  
18 prevalence of very high fever is reported only for EGY\_01\_C, MAR\_01\_C, and SDN\_01\_C.
- 19 • If a child has fever lasting more than 7 days, the provider should ask if it has been present  
20 every day. Where dengue is a concern, a fever lasting  $\geq 2$  days but  $< 7$  triggers 7 conditional  
21 assessments for that disease. However, the duration of fever is never reported. It is



1 assumed that children with a classification for dengue had a fever lasting  $\geq 2$  days but  $< 7$ .

2 Nothing is known about the duration of fever in children without such classifications.

3 • In all the populations except SDN\_01\_C and ZDN\_01\_C, providers who find ‘ear discharge’  
4 should ask long it has lasted, but the prevalence of ‘ear discharge’ is not reported.

5 • In Burkina Faso, a child is to be offered RUTF to assess feeding if it is  $\geq 6$  months old, it has  
6 no severe classifications, and its WHF/L z-score is  $< -3$  or it has a MUAC  $< 115$  mm. A child  
7 with the same classifications and the same nutritional findings but who is  $< 6$  months should  
8 have an assessment of breastfeeding. Neither the nutritional findings nor the ages are  
9 reported.

10 • The triggers for an assessment of HIV status include ‘HIV status unknown’, ‘episode of  
11 diarrhea in last 3 months’, ‘discharge from ear at any time’, and ‘mother is HIV positive’. The  
12 first 2 of these items are never reported for the populations in which HIV is a concern. The  
13 third is reported only for ZAF\_01\_C.

14 • The presence of a feeding problem triggers the task ‘counsel the mother on feeding  
15 according to the “food box” on the “counsel the mother” chart’. The prevalence of feeding  
16 problems is reported only for EGY\_01\_C, MAR\_01\_C, and SDN\_01\_C.

17 • A prolonged cough is among the signs that trigger the task ‘refer to hospital/specialist for  
18 assessment’. However, the duration of a cough is never reported.

19 • Signs of shock trigger 2 tasks for patients with dengue fever, but such signs are never  
20 reported.

21 The organization of work refers to how tasks are shared by different categories of clinic

22 staff. The only studies that examine this topic are the health facility surveys carried out in Egypt,

1 Morocco, and Sudan under the auspices of the WHO's Eastern Mediterranean Region. All  
2 provide information on who weighs the child and takes her temperature with a thermometer.  
3 MAR\_01\_C also reports 'check weight against growth chart', 'check breastfeeding status', 'assess  
4 use of other foods and fluids' and 'assess feeding practices during this illness'. EGY\_02\_C reports  
5 on assessments of feeding practices of children less than 2 years old without very low weight,  
6 'counsel the mother on feeding according to the "food box"', and 'advise mother when to return  
7 immediately'. It also reports on how different kinds of staff share the counseling component of  
8 'give course of an appropriate oral antibiotic' and 'rehydrate – Plan A'.

9 Finally, the following miscellaneous information is missing.

- 10 • In all child algorithms except for the generic original, a child who is not visibly awake is to be  
11 checked for the danger sign 'lethargy'. However, the triggering condition is reported only  
12 for EGY\_01\_C, MAR\_01\_C, and SDN\_01\_C.
- 13 • In South Africa, a child with a fever should have a rapid malaria test if the test is available.  
14 The availability of such tests is not reported.
- 15 • The performance of a handful of tasks is conditional on the child being a certain age, e.g. <6  
16 months old, but such ages are never reported.
- 17 • The tasks 'give vitamin A' and 'give mebendazole' are conditional on no dose having been  
18 given in the last N months, but information on previous treatments is never available.
- 19 • The Afghanistan, Burkina Faso, Egypt, and Morocco versions of the IMCI algorithm require  
20 an oral antibiotic to be given to children  $\geq 2$  years old and with 'some dehydration' if and  
21 only if there is cholera in the area. However, the presence of cholera is never reported.

- 1 • The Morocco algorithm provides ‘assess for TB’ in a child has ‘cough or difficult breathing’  
2 or a fever and has been exposed to TB. TB exposures are not reported.
- 3 • The KwaZulu-Natal and Timor-Leste algorithms provides ‘treat cause of fever if found’ for  
4 children with the classification ‘fever – other cause’. The Timor-Leste algorithm also  
5 provides for treatment of other causes of fever, if found, in children with ‘fever-DHF  
6 unlikely’. Such causes are not reported.
- 7 • In the generic algorithms and in the Afghanistan, India, KwaZulu-Natal, and Sudan  
8 adaptations, the procedures for classifying fever vary with the risk for malaria. Malaria risk  
9 is infrequently reported.

10 Co-Morbidities. Though the synergistic relationships among nutrition, immunity, and  
11 infection are well established [21, 41] and though co-morbidities are a focal concern of IMCI  
12 [16], only 1 of the studies on which this paper is based reports patterns of association among  
13 IMCI classifications and it excludes classifications for malnutrition and anemia [42]. As a result,  
14 this study assumes that classifications and other findings co-occur randomly. This may well not  
15 be the case.

16 The Time Required to Perform Tasks with no Minimum Duration. Estimates of the time  
17 required to perform tasks with no minimum duration use information available for just 7  
18 populations. The coefficients used to adjust these estimates for the observer effect are derived  
19 from a comparison of conspicuous observation and simulated client surveys in Benin [26]. The  
20 samples in these surveys are very small.

21 Consequences. Missing information regarding the prevalence of classifications and other  
22 findings tends to reduce estimates of the number of tasks required and thus the expected mean

1 duration of consultations. Missing information regarding the organization of work has the  
2 opposite effect. The effects of the second and third weaknesses are unknown.

### 3 **Implications**

4 Personnel Costs. The creators of the IMCI algorithm recognized that it was likely to increase the  
5 duration of consultations and, therefore, that primary care facilities might need to employ more  
6 health care providers. However, it was hoped that the increases would be modest and that they  
7 might be offset by reductions in providers' unused capacity [16, 43].

8 Studies in Bangladesh [44], Brazil [39] and Tanzania [45,46] address this issue. The  
9 Bangladesh study was carried out in Matlab, the same rural subdistrict as the 3 Bangladesh IMCI  
10 evaluations used here and just a year before BGD\_02\_C, the first in the series. The Brazil and  
11 Tanzania studies are the sources of the data used for BRA\_01\_C and TZN\_01\_C.

12 The Brazil and Tanzania studies claim to provide support for the hope that adopting the  
13 IMCI program would not require hiring additional health care providers. In Brazil, observed  
14 consultations with IMCI providers initially appeared to be 71.5 percent longer than those with  
15 non-IMCI providers, 11.08 versus 6.46 minutes. However, after controlling for other  
16 determinants of consultation length such as time of day, IMCI visits were just 29.2 percent  
17 longer [39]. In Tanzania, the average consultation with an IMCI-trained provider was 30.2  
18 percent longer than those in comparison facilities, 8.2 minutes as opposed to 6.3 [45].

19 As we have seen, however, observed consultations generally are significantly shorter  
20 than expected consultations. This is a consequence of the fact that observed task performance  
21 rates are low. In Brazil, where the results do not have to be adjusted for the presence of an  
22 observer, IMCI-trained providers performed, on average, 84 percent of 10 mandatory tasks and

1 just 48 percent of 5 conditional tasks [39]. In Tanzania, where the results do have to be adjusted  
2 for observer effects, IMCI-trained providers performed, on average, 91 percent of 7 mandatory  
3 tasks and 72 percent of 6 conditional tasks [45]. After adjustment, these figures fall to 69  
4 percent for mandatory tasks and 45 percent for conditional tasks. As we have seen, the mean  
5 expected duration of consultations is 21.2 minutes in BRA\_01\_C and 21.3 minutes in TZN\_01\_C  
6 (Table 5.2).

7 In the Bangladesh study, visits with paramedics and community health workers using a  
8 questionnaire based on the IMCI protocol were, on average, well over twice as long as those in  
9 which providers used their pre-IMCI practices, 18.8 minutes versus roughly 8 minutes. As the  
10 authors note, this suggests that adoption of the IMCI clinical algorithm is likely to result in a  
11 “significant increase” in personnel costs [44].

12 The estimates of the mean expected duration of initial IMCI consultations offered here  
13 provide strong support for the Bangladesh study. The estimates for BGD\_02\_C, BGD\_03\_C, and  
14 BGD\_04\_C exceed that for the original Bangladesh study by 2.8 to 3.0 minutes (Table 5.2). Just 2  
15 of the 27 estimates for populations 2-59 months old fall below 18.8 minutes: IND\_09\_C, by 2.7  
16 minutes and ETH\_01\_C, by just 1.6 minutes (Table 5.2).

17 In short, the personnel costs associated with adopting the IMCI algorithm likely are  
18 substantial. In the absence of adjustments for task performance rates, the observed duration of  
19 consultations should be understood not as an indicator of the time required for an initial sick  
20 child visit but, rather, as a crude measure of provider effort [47]. Observed consultations  
21 performed by IMCI-trained providers are longer than those performed by providers without  
22 such training but fall far short of the expected duration. Patients get the short end of the stick.

1            Time and the quality of care. Estimates of the expected duration of IMCI consultations  
2 confirm, yet again, that the quality of primary care for under-five infants and children in  
3 resource-poor settings is unsatisfactory [30, 48].

4            It is well established that first visits with IMCI-trained providers are “brief” [30]. A  
5 review of Service Provision Assessments (SPAs) in Haiti, Kenya, Malawi, Namibia, Nepal,  
6 Rwanda, Senegal, Tanzania, and Uganda found that, excluding “each provider’s first observed  
7 consultation to minimize the Hawthorne effect” as well as “the longest 1 percent of visits”, the  
8 duration of visits ranged from 6 minutes in Malawi, Nepal, Rwanda, and Uganda to 12 minutes  
9 in Tanzania. Across the SPA studies, “82 percent of visits were shorter than 15 minutes” [30]. It  
10 should be noted, however, that SPA reports do not distinguish between initial and follow-up  
11 visits. Nor do they provide gold standard patient classifications [49,50]. As a result, though SPA  
12 surveys provide adequate information on what tasks were performed, they have little to say  
13 about what tasks were required. Nevertheless, the SPA survey results are consistent with a  
14 recent study of rural IMCI services in Cambodia, Guatemala, Kenya, and Zambia. This study  
15 found that the mean observed duration of consultations ranged from 8.2 minutes in Zambia to  
16 12.6 minutes in Guatemala [51].

17            Measured against the estimates of the expected duration of IMCI consultations  
18 presented here, visits in these populations are, in fact, brutally brief. The bulk of consultations  
19 do not last long enough for health workers to perform even the minimum of mandatory tasks,  
20 let alone the full range of conditional assessments, treatments, and counseling messages.

21

22

## 1 **DECLARATIONS**

### 2 **Ethics approval and consent to participate**

3 Neither was required. This study did not involve human subjects, human specimens/tissue,  
4 animals of any kind, vertebrate embryos/tissues, or field research. The information used in the  
5 study was obtained from published papers and or public online sources (e.g. WHO Health  
6 Facility Survey reports). All the studies were approved by the relevant Institutional Review  
7 Boards. No additional clinical studies, surveys, interviews, or field research were conducted.

### 8 **Consent for publication**

9 Not required. All figures and tables are original.

### 10 **Availability of data and materials**

11 All supporting information is in the following files available at DOI: 10.5281/zenodo.13915575.  
12 WORKBOOK S1 provides references for all the studies used. DATA S1 and DATA S2 contain pdfs  
13 of health facility surveys found on the internet that have since been taken down. DATA S3 the  
14 2015 IMCI Chart Booklet produced by the Ministry of Health in Burkina Faso copies of which  
15 were given to me by researchers.

16 DATA S1 REPORT OF THE IMCI HEALTH FACILITY SURVEY IN BOTSWANA, 2007-2008

17 DATA S2 REPORT OF THE IMCI HEALTH FACILITY SURVEY IN TANZANIA, 2003

18 DATA S3 BURKINA FASO IMCI CHART BOOKLET, 2015

19 TEST S1 NOTES ON ESTIMATING THE EXPECTED DURATION OF IMCI CONSULTATIONS

20 TEXT S2 NOTES ON THE CONSTRUCTION OF CLASSIFICATION PROFILES

21 TEXT S3 NOTES ON THE IDENTIFICATION OF IMCI TASKS

|    |             |                                                               |
|----|-------------|---------------------------------------------------------------|
| 1  | TEXT S4     | NOTES ON THE ESTIMATION OF THE TIME REQUIRED TO PERFORM TASKS |
| 2  |             | WITH NO MINIMUM DURATION                                      |
| 3  | WORKBOOK S1 | STUDIES USED                                                  |
| 4  | WORKBOOK S2 | CLASSIFICATION PROFILES FOR INFANTS                           |
| 5  | WORKBOOK S3 | CLASSIFICATION PROFILES FOR CHILDREN IN UPPER MIDDLE-INCOME   |
| 6  |             | COUNTRIES                                                     |
| 7  | WORKBOOK S4 | CLASSIFICATION PROFILES FOR CHILDREN IN LOWER MIDDLE-INCOME   |
| 8  |             | COUNTRIES, PART I                                             |
| 9  | WORKBOOK S5 | CLASSIFICATION PROFILES FOR CHILDREN IN LOWER MIDDLE-INCOME   |
| 10 |             | COUNTRIES, PART II                                            |
| 11 | WORKBOOK S6 | CLASSIFICATION PROFILES FOR CHILDREN IN LOW INCOME COUNTRIES  |
| 12 | WORKBOOK S7 | IMCI CLINICAL TASKS                                           |
| 13 | WORKBOOK S8 | MINUTES PER TASKS WITH NO MINIMUM DURATION                    |

14 **Competing Interests**

15 None

16 **Funding**

17 None

18 **Authors' contributions**

19 AC is responsible for all the work that went into this paper. He designed the study, collected and  
20 analyzed the data, wrote the paper, and wrote any required revisions.

21 **REFERENCES**



- 1 1. Byrne P, Long B. Doctors Talking to Patients: A Study of the Verbal Behavior of General  
2 Practitioners Consulting in their Surgeries. London: H. M. Stationary Office; 1976.
- 3 2. Fiscella K, Epstein R. So much to do, so little time: care for the socially disadvantage and  
4 the 15-minute visit. Archives of Internal Medicine. 2008;168(17):1843-1852.
- 5 3. Royal College of General Practitioners. The 2022 GP: A vision for General Practice in the  
6 future NHS 2013 [24 June 2022]. Available from:  
7 [https://www.pulsetoday.co.uk/news/uncategorised/in-full-the-2022-gp-a-vision-for-general-  
9 practice-in-the-future-nhs/](https://www.pulsetoday.co.uk/news/uncategorised/in-full-the-2022-gp-a-vision-for-general-<br/>8 practice-in-the-future-nhs/).
- 10 4. Primary Health Care Performance Initiative. Primary Health Care Vital Signs Profiles:  
11 Detailed Methodology Note: Primary Health Care Performance Initiative; 2018 [24 July 2021].  
12 Available from:  
13 [https://improvingphc.org/sites/default/files/2018.10.22%20VSP%20Methodology%20Note\\_0.p  
15 df.](https://improvingphc.org/sites/default/files/2018.10.22%20VSP%20Methodology%20Note_0.p<br/>14 df.)
- 16 5. Hughes D. Consultation length and outcome in two group general practices. British  
17 Journal of General Practice. 1983;33(248):143-147.
- 18 6. Roland M, Bartholomew J, Courtenay M, Morris R, Morrell D. The “five minute”  
19 consultation: effect of time constraint on clinical content and patient satisfaction. British  
20 Medical Journal. 1986;292:870-873.
- 21 7. Howie J, Porter A, Forbes J. Quality and the use of time in general practice: widening the  
22 discussion. British Medical Journal. 1989;298:1008-1010.
- 23 8. Howie J, Porter A, Porter D, Hopton J. Long to short consultation ratio: a proxy measure  
24 of quality of care for general practice. British Journal of General Practice. 1991;41:48-54.

- 1 9. Wilson A. Consultation length in general practice: a review. *British Journal of General*  
2 *Practice*. 1991;41:119-122.
- 3 10. Freeman G, Horder J, Howie J, Pali Hungin A, Hill A, Shah N, et al. Evolving general  
4 *practice consultation in Britain: issues of length and context*. *British Medical Journal*.  
5 2002;324:880-882.
- 6 11. Wilson A, Childs S. The relationship between consultation length, process and outcomes  
7 *in general practice: a systematic review*. *British Journal of General Practice*. 2002;52(485):1012-  
8 1020.
- 9 12. Deveugele M, Derese A, van den Brink-Muinen A, Bensing J, De Maeseneer J.  
10 *Consultation length in general practice: cross sectional study in six European countries*. *British*  
11 *Medical Journal*. 2002;235:7362.
- 12 13. Reyburn, Mwakasungula E, Chonya S, Mtei F, Bygbjerg I, Poulsen A, et al. Clinical  
13 *assessment and treatment in paediatric wards in the north-east of the United Republic of*  
14 *Tanzania*. *Bulletin of the World Health Organization*. 2008;86:132-139.
- 15 14. Dugdale D, Epstein E, Pantilat S. Time and the patient–physician relationship. *Journal of*  
16 *General Internal Medicine*. 1999;14:S34-S40.
- 17 15. Outomuro D, Actis A. Estimación del tiempo de consulta ambulatoria en clínica médic.  
18 *Revista Médica de Chile*. 2013;141:361-6.
- 19 16. Tulloch J. The integrated approach to child health in developing countries. *The Lancet*.  
20 1999;354:16-20.

- 1 17. World Health Organization. Health Facility Survey: Tool to Evaluate the Quality of Care  
2 Delivered to Sick Children Attending Outpatient Facilities Geneva, Switzerland: World Health  
3 Organization; 2003. Available from: <https://apps.who.int/iris/handle/10665/42643>.
- 4 18. Druss B, Mechanic D. Should visit length be used as a quality indicator in primary care.  
5 The Lancet. 2003;361(9364):1148.
- 6 19. Gove S. Integrated management of childhood illness by outpatient health workers:  
7 technical basis and overview. Bulletin of the World Health Organization. 1997;75:7-24.
- 8 20. Boschi-Pinto C, Labadie G, Dilip T, Oliphant N, Dalglish S, Aboubaer S, et al. Global  
9 implementation survey of Integrated Management of Childhood Illness (IMCI): 20 years on. BMJ  
10 Open [Internet]. 2018; 8:e019079.
- 11 21. Scrimshaw NS, SanGiovanni JP. Synergism of nutrition, infection, and immunity: an  
12 overview. American Journal of Clinical Nutrition. 1997;66(2):464S-477S.
- 13 22. Black R, Morris S, Bryce J. Where and why are 10 million children dying every year. The  
14 Lancet. 2003;361(9376):2226-2234.
- 15 23. Victora C, Adam T, Bryce T, Evans D. Integrated management of the sick child. In: Jamison  
16 DT, J G Breman, A R Measham, G Alleyne, M Claeson, D B Evans, P Jha, A Mills and P Musgrove,  
17 editors. Disease Control Priorities in Developing Countries. 2nd ed. Washington, DC: World Bank  
18 and Oxford University Press; 2006.
- 19 24. Rowe AK, Hirnschall G, Lambrechts T, Bryce J. Linking the Integrated Management of  
20 Childhood Illness (IMCI) and health information system (HIS) classifications: issues and options.  
21 Bulletin of the World Health Organization. 1999;77(12):988-995.

- 1 25. World Health Organization. Handbook: IMCI Integrated Management of Childhood  
2 Illness Geneva: World Health Organization; 2005. Available from:  
3 <https://apps.who.int/iris/handle/10665/42939>.
- 4 26. Rowe AK, Onikpo F, Lama M, Deming MS. Evaluating health worker performance in Benin  
5 using the simulated client method with real children. *Implementation Science*. 2012;7(1):1-11.
- 6 27. Bernasconi A, Crabbé F, Adedeji AM, Bello A, Schmitz T, Landi M, et al. Results from one-  
7 year use of an electronic clinical decision support system in a post-conflict context: an  
8 implementation research. *PloS One*. 2019;14:e0225634.
- 9 28. Mustafa L. A hospital based prospective observational cross sectional study from India to  
10 evaluate the role of integrated management of childhood illness (IMCI) in under five childhood  
11 illnesses (6 months to 5 years). *Journal of Pediatrics and Neonatal Care*. 2016;4(6):151-159.
- 12 29. Mæstad O, Torsvik G, Aakvik A. Overworked? On the relationship between workload and  
13 health worker performance. *Journal of Health Economics*. 2010;29(5):686-698.
- 14 30. Kruk ME, Gage AD, Mbaruku GM, Leslie HH. Content of care in 15,000 sick child  
15 consultations in nine lower-income countries. *Health Services Research*. 2018;53(4):2084-2098.
- 16 31. Boulanger LL, Lee LA, Odhacha A. Treatment in Kenyan rural health facilities: projected  
17 drug costs using the WHO-UNICEF integrated management of childhood illness (IMCI)  
18 guidelines. *Bulletin of the World Health Organization*. 1999;77(10):852-858.
- 19 32. Mitchell M, Msellem D, Lesh N. Using electronic technology to improve clinical care:  
20 results from a before-after cluster trial to evaluate assessment and classification of of sick  
21 children according to Integrated Management of Childhood Illness (IMCI) protocol in Tanzania.  
22 *BMC Medical Informatics and Decision Making* [Internet]. 2013; 13:1-8.

- 1 33. Simoes E, Desta T, Tessema T, Gerbresellassie T, Dagne M, Gove S. Performance of  
2 health workers after training in integrated management of childhood illness in Gondar, Ethiopia.  
3 Bulletin of the World Health Organization. 1997;75(Suppl 1):43.
- 4 34. Ministry of Health-Zambia. Zambia 2018 National Integrated Management of Newborn  
5 and Childhood Illnesses Health Facility Survey Report Lusaka, Zambia: Ministry of Health-  
6 Zambia; 2018. Available from: [https://www.afro.who.int/publications/zambia-2018-national-](https://www.afro.who.int/publications/zambia-2018-national-integrated-management-newborn-and-childhood-illnesses-health)  
7 [integrated-management-newborn-and-childhood-illnesses-health](https://www.afro.who.int/publications/zambia-2018-national-integrated-management-newborn-and-childhood-illnesses-health).
- 8 35. Jibo AM. Assessment of the Effect of Implementation of the Integrated Management of  
9 Childhood Illnesses (IMCI) Approach on Childcare in Kano State Nigeria Zaria, Nigeria: Ahmadu  
10 Bello University Teaching Hospital; 2010. Available from: Available at  
11 <https://dissertation.npmcn.edu.ng/index.php/FMCPH/article/Aview/2475>.
- 12 36. Ministry of Health and Population-Egypt. Health Facility Survey on Outpatient Child Care  
13 (IMCI) Services, Egypt, March 2002 Cairo: World Health Organization; 2003. Available from:  
14 [http://applications.emro.who.int/dsaf/EMRPUB\\_2002\\_EN\\_1370.pdf](http://applications.emro.who.int/dsaf/EMRPUB_2002_EN_1370.pdf).
- 15 37. Ministry of Health-Morocco. IMCI Health Facility Survey, Morocco, October-December  
16 2007 Cairo: World Health Organization; 2009. Available from:  
17 <http://applications.emro.who.int/dsaf/dsa973.pdf>.
- 18 38. Ministry of Health-Sudan. IMCI Health Facility Survey, Sudan, March-April 2003 Cairo:  
19 World Health Organization; 2004. Available from:  
20 [http://applications.emro.who.int/dsaf/EMRPUB\\_2003\\_EN\\_1369.pdf](http://applications.emro.who.int/dsaf/EMRPUB_2003_EN_1369.pdf).

- 1 39. Adam T, Amorim DG, Edwards SJ, Amaral J, Evans DB. Capacity constraints to the  
2 adoption of new interventions: consultation time and the Integrated Management of Childhood  
3 Illness in Brazil. *Health policy and planning*. 2005;20(suppl 1):i49-i57.
- 4 40. Herman EJ. Assessment of the quality of outpatient management of childhood illness in  
5 government and non-government health facilities, Bungoma District, Kenya, April 2002. Atlanta,  
6 GA: Centers for Disease Control and Prevention. 2002.
- 7 41. Caulfield LE, Richard SA, Black RE. Undernutrition as an underlying cause of malaria  
8 morbidity and mortality in children less than five years old. *American Journal of Tropical  
9 Medicine and Hygiene*. 2004;71:55-63.
- 10 42. Kolstad PR, Burnham G, Kalter HD, Kenya-Mugisha N, Black RE. Potential implications of  
11 the integrated management of childhood illness (IMCI) for hospital referral and pharmaceutical  
12 usage in western Uganda. *Tropical Medicine & International Health*. 1998;3(9):691-699.
- 13 43. Adam T, Bishai D, Khan M, Evans D. Methods for the costing component of the Multi-  
14 Country Evaluation of IMCI Geneva: World Health Organization; 2004. Available from:  
15 <http://www.who.int/imci-mce>.
- 16 44. Khan MM, Ahmed S, Saha K. Implementing IMCI in a developing country: estimating the  
17 need for additional health workers. *Human Resources for Health Development*. 2000;4:73-82.
- 18 45. Schellenberg JA, Bryce J, de Savigny D, Lambrechts T, Mbuya C, Mgalula L, et al. The  
19 effect of Integrated Management of Childhood Illness on observed quality of care of under-fives  
20 in rural Tanzania. *Health policy and planning*. 2004;19(1):1-10

- 1 46. Adam T, Manzi F, Schellenberg JA, Mgalula L, de Savigny D, Evans DB. Does the Integrated  
2 Management of Childhood Illness cost more than routine care? Results from the United  
3 Republic of Tanzania. *Bulletin of the World Health Organization*. 2005;83(5):369-377.
- 4 47. Das, J, Gertler, PJ. Variations in practice quality in five low-income countries: a  
5 conceptual overview. *Health Affairs*. 2007;26(3):w296-w309.
- 6 48. Rowe AK, de Savigny D, Lanata C, Victora CG. How can we achieve and maintain high-  
7 quality performance of health workers in low-resource settings. *The Lancet*. 2005;366:1026-  
8 1035.
- 9 49. USAID. Service Provision Assessment [29 September 2022]. Available from:  
10 <https://dhsprogram.com/methodology/Survey-Types/SPA.cfm>.
- 11 50. Program TD. SPA Questionnaires 2022 English [30 September 2022]. Available from:  
12 [https://dhsprogram.com/publications/publication-SPAQ8-SPA-Questionnaires-and-](https://dhsprogram.com/publications/publication-SPAQ8-SPA-Questionnaires-and-Manuals.cfm)  
13 [Manuals.cfm](https://dhsprogram.com/publications/publication-SPAQ8-SPA-Questionnaires-and-Manuals.cfm).
- 14 51. Edward A, Dam K, Chege J, Ghee AE, Zare H, Chhorvann C. Measuring pediatric quality of  
15 care in rural clinics — a multi-country assessment — Cambodia, Guatemala, Zambia, and Kenya.  
16 *International Journal for Quality in Health Care*. 2016;24:586-593..

17
